# Supplementary material for: Capture and corporate cooptation: the role of the Mexican Foundation for Health in public health policy
Source: Frontiers journal article supplement (doi:10.3389/fpos.2024.958854), 2024-03-07
Supplement: Data_Sheet_1.xlsx [file Data_Sheet_1.xlsx]

## Sheet: Supplementary material 1
	ACTIVE MEMBERS, ASSOCIATE DIRECTORS, HONORARY MEMBERS, COUNCIL OF INSTITUTIONAL ASSOCIATES FUNSALUD 2021
Active Associates	Carlos Fabián Abelleyra Cordero, CEO de Aspen Labs y ex presidente de CANIFARMA; Alejandro Alfonso Díaz, Director General en Centro Médico ABC; Rogelio Ambrosi, fundador de BluMedica y gerente en Merck Group; Ricardo Amtmann Aguilar, CEO de Inverka S.A de C.V; Javier Arroyo Navarro, Operador de Farmacias Guadalajara / vicepresidente de la Cámara de Comercio de Guadalajara; Alberto Baillères Gonzá…
Associate Directors	Eric Hágsater Gartenberg (Presidente FUNSALUD), director del herbario de la Asociación Mexicana de Orquideología, del Instituto Chinoin y fundador y director de PRONATURA, A.C; Alejandro Alfonso Díaz (Vicepresidente), Director General en Centro Médico ABC; Javier Arroyo Navarro (vicepresidente), Operador de Farmacias Guadalajara / vicepresidente de la Cámara de Comercio de Guadalajara; Mariana Ba…
	Advisers: María Luisa Barrera Serna, Directora en MEDCOM; Pablo Escandón Cusi ex director general y expresidente del Consejo de Administración de Grupo Nadro; miembro del Consejo Mexicano de Negocios (CMN), y del Instituto Nacional de Medicina Genómica; Manuel Martínez Domínguez, exresidente de Genoma, S.A., y miembro de la Comisión Nacional de Arbitraje Médico (CONAMED); José Alfredo Santos Assé…
Honorary Associates	Mariana Baños Reynaud, presidenta de Pro Ayuda a la Mujer Origen, A.C.; Fernando Gabilondo Navarro, exdirector general de Instituto Nacional de Ciencias Médicas y Nutrición “Salvador Zubirán”,
	Eduardo González Pier, ex coordinador de Planeación Estratégica en la Secretaria de Salud en el gobierno de Vicente Fox, así como economista en el Fondo Monetario Internacional (FMI) y en el Banco Mundial (BM); Andrea Hernández Velasco, presidenta del Consejo de Administración de ProAgro, S.A. de C.V., e integrante del Consejo Consultivo de Grupo Financiero Banamex, S.A., Mercedes Juan López exse…
Council of Institutional Associates	Abbvie Farmacéuticos, S.A. de C.V.; Amgen México, S.A. de C.V.; Asociación Mexicana de Industrias de Investigación Farmaceútica, A.C. (AMIIF); Asociación Mexicana de Instituciones de Seguros; Asociación Nacional de Hospitales Privados, A.C., y BMSA Group, Boehringer Ingelheim (Promeco); Cámara Nacional de la Industria Farmacéutica, A.C. (CANIFARMA); Diabetes Care México CA&C de Roche Servicios de…

## Sheet: Supplementary material 2
	Applied science		Basic science		Social and cultural environment
YEAR	1st place	2nd place	1st place	2nd place	1st place	2nd place
2015	Weight Status of Mexican immigrant women: a comparison with women in Mexico and with US-born Mexican American women.	Feasibility and impact of Creciendo Sanos, a clinic-based pilot intervention to prevent obesity among preschool children in Mexico City.	Adult exercise effects on oxidative stress and reproductive programming in male offspring of obese rats.	Transcriptional regulation of the sodium-coupled neutral amino acid transporter (SNAT 2) by 17b-estradiol.	Social disorder, physical activity and adiposity in Mexican adults: evidence from a longitudinal study	Body dissatisfaction and sociocultural factors in women with and without BED: their relation with eating psychopathology.
Authors	Sylvia D. Guendelman; Miranda Ritterman Weintraub; Lia CH Fernald y Martha Kaufer Horwitz..	Gloria Oliva Martínez Andrade, Elizabeth M. Cespedes, Sheryl L. Rifas-Shiman, Guillermina Romero Quechol, Marco Aurelio González Unzaga, María Amalia Benítez Trejo, Samuel Flores Huerta, Chrissy Horan, Jess Haines, Elsie M. Taveras, Ricardo Pérez Cuevas y Matthew Gillman.	Mery Santos, Guadalupe L. Rodríguez González, Carlos Ibáñez, Claudia C. Vega, Peter Nathanielsz y Elena Zambrano.	Laura A Velázquez Villegas, Víctor Ortiz, Anders Ström, Nimbe Torres, David A. Engler, Risë Matsunami, David Ordaz Rosado, Rocío García Becerra, Adriana M. López Barradas, Fernando Larrea, Jan Ake Gustafsson, Armando R. Tovar.	Luis Ortiz Hernández, Ian Janssen.	ML Bautista Díaz, K Franco Paredes, JM Mancilla Díaz, G Álvarez Rayón, X López Aguilar, T Ocampo Téllez-Girón, Y Soto González.
Institution	INCMNSZ	IMSS SIGLO XXI	INCMNSZ	INCMNSZ	UAM-XOCHIMILCO	UNAM
2016	Cardiometabolic risk in Young adults from northern Mexico: Revisting body mass index and eaist-circunference as predictors	Sensory evaluation of daisy supplements enriched with reduced iron, ferrous sulfate or ferrous fumarate	Oral fat perception is related with body mass index, preference and onsumption of high-fat foods	Accelerated aging of reproductive capacity in male rat offspring of protein-restricted mothers is associated with increased testicular and sperm oxidative stress	Deserted convocation	Deserted convocation
Authors	Abraham Wall-Medrano; Arnulfo Ramos-Jiménez; Rosa Hernández-Torres; Rafael Villalobos-Molina; Diana Tapia-Pancardo; Rafael Jiménez-Flres; René Médez-Cruz; MiguelMurgiía-Romero; Itzell Gallardo-Ortíz.	Josefina Morales; Elena Sánchez-Vargas; Rodrigo García-Zepeda; Salvador Villalpando.	Nina Martínez-Ruiz; José López-Díaz; Abraham Wall-Medrano; Jorge Jiménez-Castro; Ofelia Angulo.	Guadalupe Rodríguez-González; Luis Reyes-Castro; Claudia Vega; Lourdes Boeck; Carlos Ibáñez; Peter Nathanielsz; Fernando Larrea; Elena Zambrano.
Institution	Univ. Auto. Cd. Juarez	INCMNSZ	Univ. Auto. Cd. Juarez	NCMNSZ	-	-
2017	'Dose-to-Mother' Deuterium Oxide Dilution Technique: An Accurate Strategy to Measure Vitamin A Intake in Breastfed Infants.	Environmentally Driven Increases in Type 2 Diabetes and Obesity in Pima Indians and Non-Pimas in Mexico over a 15-Year Period: The Maycoba Project.	Changes in milk composition in obese rats consuming a high-fat diet.	Hypocholesterolemic Properties and Prebiotic Effects of Mexican Ganoderma lucidum in C57BL/6 Mice.	Barriers to Lose Weight from the Perspective of Children with Overweight/Obesity and their Parents: A Sociocultural Approach.	Cuerpo y percepción en una zona rural de México: ¿una preocupación solo de mujeres o también de hombres?
Authors	Verónica López Teros; Ana Teresa Limón Miro; Humberto Astiazaran García; Sherry A. Tanumihardjo; Orlando Tortoledo Ortiz; Mauro E. Valencia Juillerat	Julian Esparza Romero; Mauro E. Valencia Juillerat; Rene Urquidez Romero; Lisa S. Chaudhari; Robert L. Hanson; William C. Knowler,; Eric Ravussin; Peter H. Bennett, B; Leslie O. Schulz.	Claudia Janet Bautista Carbajal; Sara Montaño Benavides; Victoria Ramírez González; Angélica Morales Miranda; Peter W. Nathanielsz; Norma Araceli Bobadilla Sandoval; Elena Zambrano González.	María Eugenia Meneses Álvarez; Daniel Martínez Carrera; Nimbe Torres y Torres; Mónica Sánchez Tapia; Miriam Aguilar López; Porfirio Morales Almora; Mercedes Sobal Cruz; Teodoro Bernabé González; Alan Helios Escudero Uribe; Omar Granados Portillo; Armando Tovar Palacio	Ana Lilia Rodríguez Ventura; Ingris Peláez Ballestas; Reyna Sámano Sámano; Carlos Jiménez Gutiérrez; Carlos Aguilar Salinas.	Ana Gabriela Romero Juárez; Sara Elena Pérez Gil Romo; Sergio Aarón de la Rosa Cruz.
Institution	USON	CIAD	NCMNSZ	COLPOS	INPeR	NCMNSZ
2018	Development and validation of new predictive equation for resting energy expenditure in adults with overweight and obesity.	Deserted convocation	Obesogenic diet intake during pregnancy programs aberrant synaptic plasticity and addiction-like behavior to a palatable food in offspring.	Deserted convocation	Energy density of foods and diets in Mexico and their monetary cost by socioeconomic strata: analyses of ENSANUT data 2012.	Deserted convocation
Authors	Martha Guevara Cruz; Ximena Orozco Ruiz; Edgar Pichardo Ontivero; Armando Tovar Palacio; Nimbe Torres y Torres; Isabel Medina Vera, Federica Prinelli, Claudio L. Lafortuna.		Alberto Camacho Morales; Larisa Montalvo Martínez, Robbi E. Cárdenas Pérez; Lizeth Fuentes Mera; Lourdes Garza Ocañas.		Alfonso Mendoza Velázquez; Ana Elena Pérez Gómez; Anju Aggarwal; Adam Drewnowski.
Institution	NCMNSZ	-	UANL	-	UPAEP	-
2019	Development of a genetic score to predict an increase in HDL cholesterol concentration after a dietary intervention in adults with metabolic syndrome	Deserted convocation	Genistein increases the thermogenic program of subcutaneous WAT and increases energy expenditure in mice	Deserted convocation	Imagen corporal y representaciones alimentarias en mujeres de trece comunidades rurales mexicanas	Deserted convocation
Authors	Martha Guevara Cruz;Isabel Medina Vera; Adriana Flores López; Miriam Aguilar López; Caren E. Smith Laurence D. Parnell Yu-Chi Lee; Chao-Qiang Lai; Armando Tovar Palacio; José M. Ordovás; Nimbe Torres y Torres	-	Dra. Berenice Palacios González; Ariana Vargas Castillo; Laura Alejandra Velázquez Villegas; Sarai Vasquez Reyes; Patricia López; Lilia Guadalupe Noriega López; Gabriela Aleman Escondrillas; Claudia Tovar Palacio; Iván Torre Villalvazo; Li-Jun Yang; Angel Zarain Herzberg; Nimbe Torres y Torres; Armando Tovar Palacio		Sara Elena Pérez Gil; Ana Gabriela Romero Juárez.
	.
Institution	INCMNSZ	-	INCMNSZ	-	INCMNSZ	-
2020	Genistein stimulates insulin sensitivity through gut microbiota reshaping and skeletal muscle AMPK activation in obese subjects	Enteral Docosahexaenoic Acid and Retinopathy of Prematurity: A Randomized Clinical Trial	Impaired prolactin actions mediate altered offspring metabolism induced by maternal high-fat feeding during lactation.	Interactions Between Diet Quality and Interleukin-6 Genotypes Are Associated With Metabolic and Renal Function Parameters in Mexican Patients With Type 2 Diabetes Mellitus	Overvaluation of Eating and Satiation Explains the Association of Food Insecurity and Food Intake With Obesity and Cardiometabolic Diseases	Deserted convocation
Authors	Martha Guevara- Cruz, Einar T Godínez- Salas, Mónica Sánchez- Tapia, Gonzalo Torres- Villalobos, Edgar Pichardo- Ontiveros, Rocío Guizar- Heredia, Liliana Arteaga- Sánchez, Gerardo Gamba, Raúl Mojica- Espinosa, Alejandro Schcolnik- Cabrera, Omar Granados, Adriana López- Barradas, Ariana Vargas- Castillo, Iván Torre- Villalvazo, Lilia G Noriega, Nimbe Torres, Armando R Tovar.	Mariela Bernabe-García, Raúl Villegas-Silva, Astrid Villavicencio-Torres, Philip C. Calder, Maricela Rodríguez-Cruz, Jorge Maldonado-Hernández, Denisse Macías-Loaiza, Mardia López-Alarcón, Patricia Inda-Icaza, Leonardo Cruz-Reynoso.	Ericka A. de los Ríos, Xarubet Ruiz-Herrera, Viridiana Tinoco-Pantoja, Fernando López-Barrera, Gonzalo Martínez de la Escalera, Carmen Clapp, Yazmín Macotela	Erika F. Gómez-García, Laura Cortés-Sanabria, Alfonso M. Cueto-Manzano, R. Susana Medina-Zavala, Luis Eduardo Hernández-Ramos, Héctor Ramón Martínez-Ramírez, José Clemente Vásquez-Jiménez, Francisco Mendoza-Carrera.	María C. Caamaño, Olga P. García, Pablo Parás, Jorge R. Palacios, Jorge L. Rosado.
Institution	INCMNSZ	IMSS	Instituto de neurobiología; UNAM.	CIBO	UAQ	-
2021	Cut-off points for serum ferritin to identify low iron stores during the first year of life in a cohort of Mexican infants.	Deserted convocation	Maternal obesity accelerates rat offspring metabolic ageing in a sex-dependent manner.	Deserted convocation	Impact of a Nutrition-Related Community Intervention on the Quantity and Quality of Children’s School almuerzo.	Deserted convocation
Authors	Azucena Pérez Acosta, Ximena Duque, Belem Trejo Valdivia, Samuel Flores Huerta, Sergio Flores Hernández, Gloria Martínez Andrade, Marco González Unzaga, Bernardo Turnbull, Ericka Escalante Izeta, Miguel Klünder Klünder, Tania Carranco Hernández, Eugenia Mendoza, Elma Ivonne Sotelo Ham, Alicia Pineda, Carolina Medina Escobedo, Homero Martínez.		Guadalupe L. Rodríguez-González, Luis A. Reyes Castro, Claudia J. Bautista, Azucena A. Beltrán, Carlos A. Ibáñez, Claudia C. Vega, Consuelo Lomas Soria, Diana C. Castro Rodríguez, Ana L. Elías-López, Peter W. Nathanielsz, Elena Zambrano.		Jenny Vilchis Gil, Miguel Klünder Klünder, Ximena Duque, Gloria Martínez Andrade, Andrea Martínez Almaráz, Brenda Beristain Lujano, Samuel Flores-Huerta.
Institution	MULTICÉNTRICO	INCMNSZ	FEDERICO GÓMEZ	-	-	-
